# Supplementary material for: Fourteen New Species of Foliar Colletotrichum Associated with the Invasive Plant Ageratina adenophora and Surrounding Crops
Source: MDPI journal article supplement (doi:10.3390/jof8020185), 2022-02-13
Supplement: s1 [file s1]

**Table S1.** Previously described *Colletotrichum* species and New species used in phylogenetic analyses

| Complex  | Species                | Strain     | Locality                            | Substrate                                          | ITS      | gapdh    | chs-1    | act      | tub2     |
|----------|------------------------|------------|-------------------------------------|----------------------------------------------------|----------|----------|----------|----------|----------|
| acutatum | <i>C. abscissum</i>    | COAD 1877  | Brazil                              | <i>Citrus sinensis</i><br>var. <i>Valencia</i>     | KP843126 | KP843129 | KP843132 | KP843141 | KP843135 |
|          | <i>C. acerbum</i>      | CBS 128530 | New Zealand                         | <i>Malus domestica</i>                             | JQ948459 | JQ948790 | JQ949120 | JQ949780 | JQ950110 |
|          | <i>C. acutatum</i>     | CBS 112996 | Australia                           | <i>Grevillea</i> sp.<br>(a wide range<br>of hosts) | JQ005776 | JQ948677 | JQ005797 | JQ005839 | JQ005860 |
|          | <i>C. arboricola</i>   | CBS 144795 | Chile                               | <i>Fuchsia magellanica</i>                         | MH817944 | MH817950 | -        | MH817956 | MH817962 |
|          | <i>C. australe</i>     | CBS 116478 | Australia,<br>South Africa          | <i>Hakea</i> sp.                                   | JQ948455 | JQ948786 | JQ949116 | JQ949776 | JQ950106 |
|          | <i>C. brisbanense</i>  | CBS 292.67 | Australia                           | <i>Capsicum annuum</i>                             | JQ948291 | JQ948621 | JQ948952 | JQ949612 | JQ949942 |
|          | <i>C. cairnsense</i>   | BRIP 63642 | Australia                           | <i>Capsicum annuum</i>                             | KU923672 | KU923704 | KU923710 | KU923716 | KU923688 |
|          | <i>C. carthami</i>     | SAPA100011 | Japan                               | <i>Carthamus tinctorius</i>                        | AB696998 | -        | -        | -        | AB696992 |
|          | <i>C. chrysanthemi</i> | IMI 364540 | China                               | <i>Chrysanthemum coronarium</i>                    | JQ948273 | JQ948603 | JQ948934 | JQ949594 | JQ949924 |
|          | <i>C. citri</i>        | CBS 134233 | China, Yunnan<br>province,<br>Ruili | <i>Citrus aurantifolia</i>                         | KC293581 | KC293741 | KY856138 | KY855973 | KC293661 |

| Complex     | Species                | Strain      | Locality                              | Substrate                                | ITS      | gapdh    | chs-1    | act      | tub2     |
|-------------|------------------------|-------------|---------------------------------------|------------------------------------------|----------|----------|----------|----------|----------|
| (continued) | <i>C. citri</i>        | YMF 1.07322 | China,Yunnan province                 | <i>Ageratina adenophora</i>              | OK030889 | OK513690 | OK513587 | -        | OK513653 |
|             | <i>C. cosmi</i>        | CBS 853.73  | Netherlands                           | <i>Cosmos</i> sp.                        | JQ948274 | JQ948604 | JQ948935 | JQ949595 | JQ949925 |
|             | <i>C. cosmi</i>        | YMF1.07337  | China,Yunnan province                 | <i>Ageratina adenophora</i>              | OK030890 | OK513691 | -        | OK513622 | -        |
|             | <i>C. costaricense</i> | CBS 330.75  | Costa Rica                            | <i>Coffea</i> sp.                        | JQ948180 | JQ948510 | JQ948841 | JQ949501 | JQ949831 |
|             | <i>C. cuscutae</i>     | IMI 304802  | Dominica                              | <i>Cuscuta</i> sp.                       | JQ948195 | JQ948525 | JQ948856 | JQ949516 | JQ949846 |
|             | <i>C. fioriniae</i>    | CBS 128517  | Australia,<br>Netherlands,<br>UK, USA | <i>Magnifera indica</i> (stem endophyte) | JQ948292 | JQ948622 | JQ948953 | JQ949613 | JQ949943 |
|             | <i>C. fioriniae</i>    | YMF 1.07323 | China,Yunnan province                 | <i>Ageratina adenophora</i>              | OK030891 | OK513692 | OK513588 | -        | -        |
|             | <i>C. godetiae</i>     | CBS 133.44  | Austria,<br>Denmark                   | <i>Aeschynomene virginica</i>            | JQ948402 | JQ948733 | JQ949063 | JQ949723 | JQ950053 |
|             | <i>C. godetiae</i>     | YMF1.07330  | China,Yunnan province                 | <i>Ageratina adenophora</i>              | OK030902 | OK513703 | OK513598 | OK513628 | -        |
|             | <i>C. guajavae</i>     | IMI 350839  | India                                 | fruit of <i>Psidium guajava</i>          | JQ948270 | JQ948600 | JQ948931 | JQ949591 | JQ949921 |
|             | <i>C. guajavae</i>     | YMF1.07334  | China,Yunnan province                 | <i>Ageratina adenophora</i>              | OK030896 | OK513697 | -        | OK513627 | -        |
|             | <i>C. indonesiense</i> | CBS 127551  | Indonesia                             | <i>Eucalyptus</i> sp.                    | JQ948288 | JQ948618 | JQ948949 | JQ949609 | JQ949939 |
|             | <i>C. javanense</i>    | CBS 144963a | Indonesia                             | <i>Capsicum annuum</i>                   | MH846576 | MH846572 | MH846573 | MH846575 | MH846574 |
|             | <i>C. johnstonii</i>   | CBS 128532  | New Zealand                           | <i>Citrus</i> sp. (fruit rot)            | JQ948444 | JQ948775 | JQ949105 | JQ949765 | JQ950095 |

| Complex     | Species                | Strain         | Locality                | Substrate                        | ITS      | gapdh    | chs-1    | act      | tub2     |
|-------------|------------------------|----------------|-------------------------|----------------------------------|----------|----------|----------|----------|----------|
| (continued) | <i>C. kinghornii</i>   | CBS 198.35     | UK                      | <i>Phormium</i> sp.              | JQ948454 | JQ948785 | JQ949115 | JQ949775 | JQ950105 |
|             | <i>C. laticiphilum</i> | CBS 112989     | Inida                   | <i>Hevea brasiliensis</i>        | JQ948289 | JQ948619 | JQ948950 | JQ949610 | JQ949940 |
|             | <i>C. lauri</i>        | MFLUCC 17-0205 | Italy                   | <i>Laurus nobilis</i>            | KY514347 | KY514344 | KY514341 | KY514338 | KY514350 |
|             | <i>C. limetticola</i>  | CBS 114.14     | Cuba, USA               | <i>Citrus aurantifolia</i>       | JQ948193 | JQ948523 | JQ948854 | JQ949514 | JQ949844 |
|             | <i>C. lupine</i>       | CBS 109225     | Germany                 | <i>Camellia</i> sp.              | JQ948155 | JQ948485 | JQ948816 | JQ949476 | JQ949806 |
|             | <i>C. melonis</i>      | CBS 159.84     | Brazil                  | <i>Cucumis melo</i>              | JQ948194 | JQ948524 | JQ948855 | JQ949515 | JQ949845 |
|             | <i>C. nymphaeae</i>    | CBS 515.78     | Netherlands             | <i>Anemone</i> sp.               | JQ948197 | JQ948527 | JQ948858 | JQ949518 | JQ949848 |
|             | <i>C. nymphaeae</i>    | YMF1.07335     | China, Yunnan province  | <i>Ageratina adenophora</i>      | OK030899 | OK513700 | OK513595 | -        | -        |
|             | <i>C. paranaense</i>   | CBS 134729     | Brazil                  | <i>Caryocar brasiliense</i>      | KC204992 | KC205026 | KC205043 | KC205077 | KC205060 |
|             | <i>C. paxtonii</i>     | IMI 165753     | St. Lucia (West Indies) | <i>Musa</i> sp.                  | JQ948285 | JQ948615 | JQ948946 | JQ949606 | JQ949936 |
|             | <i>C. phormii</i>      | CBS 118194     | Germany                 | <i>Phormium</i> sp.              | JQ948446 | JQ948777 | JQ949107 | JQ949767 | JQ950097 |
|             | <i>C. pyricola</i>     | CBS 128531     | New Zealand             | <i>Pyrus communis</i>            | JQ948445 | JQ948776 | JQ949106 | JQ949766 | JQ950096 |
|             | <i>C. rhombiforme</i>  | CBS 129953     | Portugal, USA           | <i>Olea europaea</i> (fruit rot) | JQ948457 | JQ948788 | JQ949118 | JQ949778 | JQ950108 |
|             | <i>C. roseum</i>       | CBS 145754     | Biobío                  | <i>Lapageria rosea</i>           | MK903611 | MK903603 | -        | MK903604 | MK903607 |

| Complex     | Species                  | Strain     | Locality                                      | Substrate                   | ITS      | gapdh    | chs-1    | act      | tub2     |
|-------------|--------------------------|------------|-----------------------------------------------|-----------------------------|----------|----------|----------|----------|----------|
| (continued) | <i>C. salicis</i>        | CBS 607.94 | Netherlands                                   | <i>Acer platanoides</i>     | JQ948460 | JQ948791 | JQ949121 | JQ949781 | JQ950111 |
|             | <i>C. scovillei</i>      | CBS 126529 | Indonesia                                     | <i>Capsicum annuum</i>      | JQ948267 | JQ948597 | JQ948928 | JQ949588 | JQ949918 |
|             | <i>C. simmondsii</i>     | CBS 122122 | Australia                                     | <i>Actinidia chinensis</i>  | JQ948276 | JQ948606 | JQ948937 | JQ949597 | JQ949927 |
|             | <i>C. simulanticitri</i> | YMF1.07302 | China,<br>Yunnan<br>province, Dali<br>county  | <i>Betula</i> spp.          | OK030878 | OK513680 | OK513577 | OK513615 | -        |
|             | <i>C. simulanticitri</i> | YMF1.07312 | China,<br>Yunnan<br>province                  | <i>Ageratina adenophora</i> | OK030879 | OK513681 | OK513578 | OK513616 | -        |
|             | <i>C. simulanticitri</i> | YMF1.07308 | China,<br>Yunnan<br>province                  | <i>Ageratina adenophora</i> | OK030880 | OK513682 | OK513579 | OK513617 | -        |
|             | <i>C. sloanei</i>        | IMI 364297 | Malaysia                                      | <i>Theobroma cacao</i>      | JQ948287 | JQ948617 | JQ948948 | JQ949608 | JQ949938 |
|             | <i>C. speciosum</i>      | YMF1.07301 | China,<br>Yunnan<br>province,<br>Simao county | <i>Ageratina adenophora</i> | OK030881 | -        | -        | -        | -        |
|             | <i>C. tamarilloi</i>     | CBS 129814 | Colombia                                      | <i>Solanum betaceum</i>     | JQ948184 | JQ948514 | JQ948845 | JQ949505 | JQ949835 |
|             | <i>C. walleri</i>        | CBS 125472 | Vietnam                                       | <i>Coffea</i> sp.           | JQ948275 | JQ948605 | JQ948936 | JQ949596 | JQ949926 |

| Complex   | Species                | Strain        | Locality                | Substrate                                    | ITS      | gapdh    | chs-1    | act      | tub2     |
|-----------|------------------------|---------------|-------------------------|----------------------------------------------|----------|----------|----------|----------|----------|
| agaves    | <i>C. wanningense</i>  | CGMCC 3.18936 | China, Hainan province  | <i>Hevea brasiliensis</i>                    | MG830462 | MG830318 | MG830302 | MG830270 | MG830286 |
|           | <i>C. agaves</i>       | CBS 118190    | Mexico, Netherlands     | <i>Agave</i> spp.                            | DQ286221 | -        | -        | -        | -        |
|           | <i>C. ledebouriae</i>  | CBS 141284    | South Africa            | <i>Ledebouria floridunda</i>                 | KX228254 | -        | -        | KX228357 | -        |
|           | <i>C. sansevieriae</i> | MAFF 239721   | Japan                   | <i>Sansevieria</i> sp.                       | AB212991 | -        | -        | -        | -        |
| boninense | <i>C. beeveri</i>      | CBS 128527    | New Zealand             | <i>Brachyglottis repanda</i>                 | JQ005171 | JQ005258 | JQ005345 | JQ005519 | JQ005605 |
|           | <i>C. boninense</i>    | CBS 123755    | Worldwide               | <i>Annonaceae</i><br>(a wide range of hosts) | JQ005153 | JQ005240 | JQ005327 | JQ005501 | JQ005588 |
|           | <i>C. boninense</i>    | YMF1.05227    | China,Yunnan province   | <i>Ageratina adenophora</i>                  | OK030888 | OK513689 | OK513586 | -        | OK513652 |
|           | <i>C. boninense</i>    | YMF1.07311    | China,Yunnan province   | <i>Ageratina adenophora</i>                  | OK030887 | OK513688 | OK513585 | -        | OK513651 |
|           | <i>C. brassicicola</i> | CBS 101059    | New Zealand             | <i>Brassica oleracea</i>                     | JQ005172 | JQ005259 | JQ005346 | JQ005520 | JQ005606 |
|           | <i>C. colombiense</i>  | CBS 129818    | Colombia                | <i>Passiflora edulis</i>                     | JQ005174 | JQ005261 | JQ005348 | JQ005522 | JQ005608 |
|           | <i>C. karstii</i>      | CORCG6        | China, Guizhou Province | <i>Annona cherimola</i><br>(wide range)      | HM585409 | HM585391 | HM582023 | HM581995 | HM585428 |
|           | <i>C. karstii</i>      | YMF1.07306    | China,Yunnan province   | <i>Ageratina adenophora</i>                  | OK030897 | OK513698 | OK513593 | -        | OK513658 |

| Complex        | Species                        | Strain         | Locality                               | Substrate                     | ITS      | gapdh    | chs-1    | act      | tub2     |
|----------------|--------------------------------|----------------|----------------------------------------|-------------------------------|----------|----------|----------|----------|----------|
|                | <i>C. karstii</i>              | YMF1.07307     | China,Yunnan province                  | <i>Ageratina adenophora</i>   | OK030898 | OK513699 | OK513594 | -        | OK513659 |
| dematium       | <i>C. dematium</i>             | CBS 125.25     | France                                 | <i>Bidens pilosa</i>          | GU227819 | GU228211 | GU228309 | GU227917 | GU228113 |
|                | <i>C. eryngiicola</i>          | MFLUCC 17-0318 | Russia                                 | <i>Eryngium campestre</i>     | KY792726 | KY792723 | KY792720 | KY792717 | KY792729 |
|                | <i>C. orchidis</i>             | MFLUCC 17-1302 | Italy                                  | <i>Orchis</i> sp.             | MK502144 | MK496857 | MK496855 | MK496853 | MK496859 |
| destructivum   | <i>C. americanae-borealis</i>  | CBS 136232     | USA                                    | <i>Medicago sativa</i>        | KM105224 | KM105579 | KM105294 | KM105434 | KM105504 |
|                | <i>C. destructivum</i>         | CBS 136228     | Worldwide                              | genera of <i>Asteraceae</i>   | KM105207 | KM105561 | KM105277 | KM105417 | KM105487 |
|                | <i>C. lini</i>                 | CBS 172.51     | Netherlands                            | <i>Linum</i> sp.              | JQ005765 | KM105581 | JQ005786 | JQ005828 | JQ005849 |
|                | <i>C. ocimi</i>                | CBS 298.94     | Italy,Australia                        | <i>Ocimum basilicum</i>       | KM105222 | KM105577 | KM105292 | KM105432 | KM105502 |
| dracaenophilum | <i>C. cariniferi</i>           | MFLUCC 14-0100 | Thailand                               | <i>Dendrobium cariniferum</i> | MF448521 | -        | -        | -        | MH351274 |
|                | <i>C. coelogyne</i>            | CBS 132504     | Germany                                | <i>Coelogyne</i> sp.          | MG600713 | MG600776 | MG600836 | MG600920 | MG600980 |
|                | <i>C. dracaenophilum</i>       | CBS 118199     | Bulgaria                               | <i>Dracaena</i> sp.           | JX519222 | JX546707 | JX519230 | JX519238 | JX519247 |
|                | <i>C. excelsum-altitudinum</i> | CGMCC 3.15130  | China                                  | <i>Bletilla ochracea</i>      | HM751815 | KC843502 | -        | KC843548 | JX625211 |
|                | <i>C. parallelophorum</i>      | MFLUCC 14-0083 | Thailand                               | <i>Dendrobium</i> sp.         | MF448525 | MK165695 | -        | -        | MH351280 |
|                | <i>C. robustum</i>             | YMF1.06941     | China, Guizhou province, Dushan county | <i>Ageratina adenophora</i>   | OK030877 | -        | OK513576 | OK513614 | OK513646 |

| Complex    | Species                 | Strain             | Locality                                  | Substrate                              | ITS      | gapdh    | chs-1    | act      | tub2     |
|------------|-------------------------|--------------------|-------------------------------------------|----------------------------------------|----------|----------|----------|----------|----------|
|            | <i>C. tongrenense</i>   | GMBC0209           | China,<br>Guizhou<br>province,<br>Tongren | <i>Nothapodytes<br/>pittosporoides</i> | MH482933 | MH705332 | -        | MH717074 | MH729805 |
|            | <i>C. tropicicola</i>   | MFLUCC 11-<br>0114 | Thailand                                  | <i>Citrus maxima</i>                   | JN050240 | JN050229 | -        | JN050218 | JN050246 |
|            | <i>C. yunnanense</i>    | CBS 13213          | China,<br>Yunnan,<br>Kunming              | <i>Buxus</i> sp.                       | JX546804 | JX546706 | JX519231 | JX519239 | JX519248 |
| gigasporum | <i>C. gigasporum</i>    | CBS 133266         | Madagascar                                | <i>Camelia sinensis</i>                | KF687715 | KF687822 | KF687761 | -        | KF687866 |
|            | <i>C. gigasporum</i>    | YMF1.07331         | China, Yunnan<br>province                 | <i>Ageratina<br/>adenophora</i>        | OK030895 | OK513696 | OK513592 | OK513626 | OK513657 |
|            | <i>C. gigasporum</i>    | YMF1.07336         | China, Yunnan<br>province                 | <i>Ageratina<br/>adenophora</i>        | OK030894 | OK513695 | OK513591 | OK513625 | OK513656 |
|            | <i>C. pseudomajus</i>   | CBS 571.88         | Taiwan                                    | <i>Camellia<br/>sinensis</i>           | KF687722 | KF687826 | KF687779 | KF687801 | KF687883 |
|            | <i>C. aenigma</i>       | ICMP 18608         | Israel                                    | <i>Persea<br/>americana</i>            | JX010244 | JX010044 | JX009774 | JX009443 | JX010389 |
|            | <i>C. aeschynomenes</i> | ICMP 17673         | USA                                       | <i>Aeschynomene<br/>virginica</i>      | JX010176 | JX009930 | JX009799 | JX009483 | JX010392 |
|            | <i>C. alatae</i>        | CBS 304.67         | Barbados,<br>India                        | <i>Dioscorea alata</i>                 | JX010190 | JX009990 | JX009837 | JX009471 | JX010383 |
|            | <i>C. alienum</i>       | ICMP 12071         | New Zealand                               | <i>Banksia<br/>dryandroides</i>        | JX010251 | JX010028 | JX009882 | JX009572 | JX010411 |

| Complex         | Species                 | Strain             | Locality                                            | Substrate                           | ITS      | gapdh    | chs-1    | act      | tub2     |
|-----------------|-------------------------|--------------------|-----------------------------------------------------|-------------------------------------|----------|----------|----------|----------|----------|
| gloeosporioides | <i>C. analogum</i>      | YMF1.06943         | China,<br>Yunnan<br>province,<br>Ning'er<br>county  | <i>Ageratina<br/>adenophora</i>     | OK030860 | OK513663 | OK513559 | OK513599 | OK513629 |
|                 | <i>C. analogum</i>      | YMF1.07327         | China,<br>Yunnan<br>province                        | <i>Ageratina<br/>adenophora</i>     | OK030861 | OK513664 | OK513560 | OK513600 | OK513630 |
|                 | <i>C. analogum</i>      | YMF1.07304         | China,<br>Yunnan<br>province                        | <i>Ageratina<br/>adenophora</i>     | OK030862 | OK513665 | OK513561 | OK513601 | OK513631 |
|                 | <i>C. aotearoa</i>      | ICMP 18537         | New Zealand                                         | <i>Banksia<br/>marginata</i>        | JX010205 | JX010005 | JX009853 | JX009854 | JX010420 |
|                 | <i>C. arecicola</i>     | CGMCC 3.19667      | China                                               | <i>Areca catechu</i>                | MK914635 | MK945455 | MK935541 | MK935374 | MK935498 |
|                 | <i>C. artocarpicola</i> | MFLUCC 18-<br>1167 | Thailand                                            | <i>Artocarpus<br/>heterophyllus</i> | MN415991 | MN435568 | MN435569 | MN435570 | MN435567 |
|                 | <i>C. asianum</i>       | ICMP 18580         | Thailand                                            | <i>Coffea arabica</i>               | JX010196 | JX010053 | JX009867 | JX009584 | JX010406 |
|                 | <i>C. camelliae</i>     | CGMCC<br>3.14925   | China,<br>Guizhou<br>Province                       | <i>Camellia<br/>sinensis</i>        | KJ955081 | KJ954782 | -        | KJ954363 | KJ955230 |
|                 | <i>C. cangyuanensis</i> | YMF1.05000         | China,<br>Yunnan<br>province,<br>Cangyuan<br>county | <i>Ageratina<br/>adenophora</i>     | OK030863 | OK513666 | OK513562 | OK513602 | OK513632 |



| Complex     | Species                 | Strain             | Locality                                             | Substrate                       | ITS      | gapdh    | chs-1    | act      | tub2     |
|-------------|-------------------------|--------------------|------------------------------------------------------|---------------------------------|----------|----------|----------|----------|----------|
| (continued) | <i>C. cangyuanensis</i> | YMF1.05001         | China,<br>Yunnan<br>province                         | <i>Ageratina<br/>adenophora</i> | OK030864 | OK513667 | OK513563 | OK513603 | OK513633 |
|             | <i>C. cangyuanensis</i> | YMF1.04998         | China,<br>Yunnan<br>province                         | <i>Ageratina<br/>adenophora</i> | OK030865 | OK513668 | OK513564 | OK513604 | OK513634 |
|             | <i>C. changpingense</i> | MFLUCC 15-<br>0022 | China, Beijing<br>City,<br>Changping                 | <i>Fragaria ×<br/>ananassa</i>  | KP683152 | KP852469 | KP852449 | KP683093 | KP852490 |
|             | <i>C. chrysophillum</i> | CMM4268            | Brazil                                               | <i>Musa</i> sp.                 | KX094252 | KX094183 | KX094083 | KX093982 | KX094285 |
|             | <i>C. ciggaro</i>       | ICMP 18539         | Australia                                            | <i>Olea europaea</i>            | JX010230 | JX009966 | JX009800 | JX009523 | JX010434 |
|             | <i>C. clidemiae</i>     | ICMP 18658         | USA                                                  | <i>Clidemia hirta</i>           | JX010265 | JX009989 | JX009877 | JX009537 | JX010438 |
|             | <i>C. cobbittiense</i>  | BRIP 66219a        | Australia                                            | <i>Cordyline</i> sp.            | MH087016 | MH094133 | MH094135 | MH094134 | MH094137 |
|             | <i>C. conoides</i>      | CAUG17*            | China, Jiangsu<br>Province,<br>Nanjing City          | <i>Capsicum<br/>annuum</i>      | KP890168 | KP890162 | KP890156 | KP890144 | KP890174 |
|             | <i>C. cordylinicola</i> | ICMP 18579         | Laos                                                 | <i>Eugenia<br/>javanica</i>     | JX010226 | JX009975 | JX009864 | HM470234 | JX010440 |
|             | <i>C. dimorphum</i>     | YMF1.07303         | China,<br>Guizhou<br>province,<br>Pingtang<br>county | <i>Ageratina<br/>adenophora</i> | OK030866 | OK513669 | OK513565 | OK513605 | OK513635 |

| Complex     | Species                   | Strain             | Locality                                             | Substrate                        | ITS      | gapdh    | chs-1    | act      | tub2     |
|-------------|---------------------------|--------------------|------------------------------------------------------|----------------------------------|----------|----------|----------|----------|----------|
| (continued) | <i>C. dimorphum</i>       | YMF1.07309         | China,<br>Guizhou<br>province,<br>Pingtang<br>county | <i>Ageratina<br/>adenophora</i>  | OK030867 | OK513670 | OK513566 | OK513606 | OK513636 |
|             | <i>C. endophytica</i>     | MFLUCC 13–<br>0418 | Thailand                                             | <i>Pennisetum<br/>purpureum</i>  | KC633854 | KC832854 | -        | KF306258 | -        |
|             | <i>C. fruticola</i>       | ICMP 18581         | worldwide                                            | wide range                       | JX010165 | JX010033 | JX009866 | FJ907426 | JX010405 |
|             | <i>C. fruticola</i>       | YMF1.07305         | China, Yunnan<br>province                            | <i>Ageratina<br/>adenophora</i>  | OK030893 | OK513694 | OK513590 | OK513624 | OK513655 |
|             | <i>C. fruticola</i>       | YMF1.07325         | China, Yunnan<br>province                            | <i>Ageratina<br/>adenophora</i>  | OK030892 | OK513693 | OK513589 | OK513623 | OK513654 |
|             | <i>C. fructivorum</i>     | CBS 133125         | Canada,<br>Colombia,<br>USA                          | <i>Vaccinium<br/>macrocarpon</i> | JX145145 | -        | -        | -        | JX145196 |
|             | <i>C. gloeosporioides</i> | CBS 112999         | Australia                                            | <i>Citrus</i> sp.                | JQ005152 | JQ005239 | JQ005326 | JQ005500 | JQ005587 |
|             | <i>C. gracile</i>         | YMF1.06939         | China,<br>Guizhou<br>province,<br>Nayong<br>county   | <i>Ageratina<br/>adenophora</i>  | OK030868 | OK513671 | OK513567 | OK513607 | OK513637 |
|             | <i>C. gracile</i>         | YMF1.07329         | China,<br>Yunnan<br>province                         | <i>Ageratina<br/>adenophora</i>  | OK030869 | OK513672 | OK513568 | OK513608 | OK513638 |
|             | <i>C. grevilleae</i>      | CBS 132879         | Italy                                                | <i>Grevillea</i> sp.             | KC297078 | KC297010 | KC296987 | KC296941 | KC297102 |

| Complex     | Species                   | Strain         | Locality                              | Substrate                   | ITS      | gapdh    | chs-1    | act      | tub2     |
|-------------|---------------------------|----------------|---------------------------------------|-----------------------------|----------|----------|----------|----------|----------|
| (continued) | <i>C. grossum</i>         | CAUG7*         | China, Hainan Province                | <i>Capsicum annuum</i>      | KP890165 | KP890159 | KP890153 | KP890141 | KP890171 |
|             | <i>C. hebeiense</i>       | MFLUCC 13-0726 | China, Hebei province                 | <i>Vitis vinifera</i>       | KF156863 | KF377495 | KF289008 | KF377532 | KF288975 |
|             | <i>C. hedericola</i>      | MFLU 15-0689   | Italy                                 | <i>Hedera helix</i>         | MN631384 | -        | MN635794 | MN635795 | -        |
|             | <i>C. helleniense</i>     | CBS 142418     | Greece                                | <i>Citrus reticulata</i>    | KY856446 | KY856270 | KY856186 | KY856019 | KY856528 |
|             | <i>C. henanense</i>       | CGMCC 3.17354  | China, Henan Province, Xinyang        | <i>Camellia sinensis</i>    | KJ955109 | KJ954810 | -        | KM023257 | KJ955257 |
|             | <i>C. horii</i>           | ICMP 10492     | Brazil, China                         | <i>Diospyros kaki</i>       | GQ329690 | GQ329681 | JX009752 | JX009438 | JX010450 |
|             | <i>C. hystricis</i>       | CBS 142411     | Italy                                 | <i>Citrus hystrix</i>       | KY856450 | KY856274 | KY856190 | KY856023 | KY856532 |
|             | <i>C. jiangxiense</i>     | CGMCC 3.17363  | China, Jiangxi Province, Ganzhou      | <i>Camellia sinensis</i>    | KJ955201 | KJ954902 | -        | KJ954471 | KJ955348 |
|             | <i>C. kahawae</i>         | ICMP17816      | African continent                     | <i>Coffea arabica</i>       | JX010231 | JX010012 | JX009813 | JX009452 | JX010444 |
|             | <i>C. makassarensense</i> | CBS 143664a    | Indonesia                             | <i>Capsicum annuum</i>      | MH728812 | MH728820 | MH805850 | MH781480 | MH846563 |
|             | <i>C. musae</i>           | ICMP19119      | Worldwide                             | <i>Musa</i> sp.             | HQ596292 | HQ596299 | JX009896 | HQ596284 | HQ596280 |
|             | <i>C. nanhuaensis</i>     | YMF1.04993     | China, Yunnan province, Nanhua county | <i>Ageratina adenophora</i> | OK030870 | OK513673 | OK513569 | OK513609 | OK513639 |

| Complex     | Species                 | Strain             | Locality                                        | Substrate                       | ITS      | gapdh    | chs-1    | act      | tub2     |
|-------------|-------------------------|--------------------|-------------------------------------------------|---------------------------------|----------|----------|----------|----------|----------|
| (continued) | <i>C. nanhuaensis</i>   | YMF1.04990         | China,<br>Yunnan<br>province                    | <i>Ageratina<br/>adenophora</i> | OK030871 | OK513674 | OK513570 | OK513610 | OK513640 |
|             | <i>C. nullisetosum</i>  | YMF1.06946         | China,<br>Yunnan<br>province,<br>ning'er county | <i>Mangifera<br/>indica</i>     | OK030872 | OK513675 | OK513571 | OK513611 | OK513641 |
|             | <i>C. nullisetosum</i>  | YMF1.07328         | China,<br>Yunnan<br>province                    | <i>Mangifera<br/>indica</i>     | OK030873 | OK513676 | OK513572 | OK513612 | OK513642 |
|             | <i>C. nupharicola</i>   | ICMP 18187         | USA                                             | <i>Nuphar,<br/>Nymphae</i>      | JX010187 | JX009972 | JX009835 | JX009437 | JX010398 |
|             | <i>C. oblongisporum</i> | YMF1.06938         | China,<br>Yunnan<br>province,<br>Kunming city   | <i>Ageratina<br/>adenophora</i> | OK030874 | OK513677 | OK513573 | -        | OK513643 |
|             | <i>C. oblongisporum</i> | YMF1.07326         | China,<br>Yunnan<br>province                    | <i>Ageratina<br/>adenophora</i> | OK030875 | OK513678 | OK513574 | -        | OK513644 |
|             | <i>C. pandanicola</i>   | MFLUCC 17-<br>0571 | Thailand                                        | <i>Pandanus</i> sp.             | MG646967 | MG646934 | MG646931 | MG646938 | MG646926 |
|             | <i>C. parvisporum</i>   | YMF1.06942         | China,<br>Guangxi<br>province,<br>Debao         | <i>Ageratina<br/>adenophora</i> | OK030876 | OK513679 | OK513575 | OK513613 | OK513645 |

| Complex     | Species                       | Strain         | Locality                                | Substrate                     | ITS      | gapdh    | chs-1    | act      | tub2     |
|-------------|-------------------------------|----------------|-----------------------------------------|-------------------------------|----------|----------|----------|----------|----------|
| (continued) | <i>C. perseae</i>             | CBS 141365     | Israel                                  | <i>Persea Americana</i>       | KX620308 | KX620242 | -        | KX620145 | KX620341 |
|             | <i>C. pseudotheobromicola</i> | MFLUCC 18-1602 | China, Beijing                          | <i>Prunus avium</i>           | MH817395 | MH853675 | MH853678 | MH853681 | MH853684 |
|             | <i>C. psidii</i>              | CBS 145.29     | Italy                                   | <i>Psidium</i> sp.            | JX010219 | JX009967 | JX009901 | JX009515 | JX010443 |
|             | <i>C. proteae</i>             | CBS 132882     | South Africa                            | <i>Protea</i> sp.             | KC297079 | KC297009 | KC296986 | KC296940 | KC297101 |
|             | <i>C. queenslandicum</i>      | ICMP 1778      | Australia                               | <i>Anacardium occidentale</i> | JX010276 | JX009934 | JX009899 | JX009447 | JX010414 |
|             | <i>C. rhexiae</i>             | CBS 133134     | USA                                     | <i>Rhexia virginica</i>       | JX145128 | -        | -        | -        | JX145179 |
|             | <i>C. salsolae</i>            | ICMP 19051     | Hungary                                 | <i>Salsola tragus</i>         | JX010242 | JX009916 | JX009863 | JX009562 | JX010403 |
|             | <i>C. siamense</i>            | ICMP 18578     | worldwide                               | wide range                    | FJ972613 | FJ972575 | JX009865 | FJ907423 | FJ907438 |
|             | <i>C. subhenanense</i>        | YMF1.06865     | China, Yunnan province, Cangyuan county | <i>Ageratina adenophora</i>   | OK030883 | OK513684 | OK513581 | OK513618 | OK513647 |
|             | <i>C. subhenanense</i>        | YMF1.07324     | China, Yunnan province                  | <i>Ageratina adenophora</i>   | OK030884 | OK513685 | OK513582 | OK513619 | OK513648 |
|             | <i>C. syzygiicola</i>         | MFLUCC 10-0624 | Thailand                                | <i>Citrus aurantifolia</i>    | KF242094 | KF242156 | -        | KF157801 | KF254880 |
|             | <i>C. tainanense</i>          | CBS 143666a    | Taiwan                                  | -                             | MH728818 | MH728823 | MH805845 | MH781475 | MH846558 |
|             | <i>C. theobromicola</i>       | ICMP 18649     | worldwide                               | wide range of hosts           | JX010294 | JX010006 | JX009869 | JX009444 | JX010447 |

| Complex     | Species                  | Strain        | Locality                                 | Substrate                    | ITS      | gapdh    | chs-1    | act      | tub2     |
|-------------|--------------------------|---------------|------------------------------------------|------------------------------|----------|----------|----------|----------|----------|
| (continued) | <i>C. temperatum</i>     | CBS 133122    | USA                                      | <i>Vaccinium macrocarpon</i> | JX145159 | -        | -        | -        | JX145211 |
|             | <i>C. ti</i>             | ICMP 4832     | New Zealand                              | <i>Cordyline</i> sp.         | JX010269 | JX009952 | JX009898 | JX009520 | JX010442 |
|             | <i>C. tropicale</i>      | CBS 124949    | tropical region                          | wide host range              | JX010264 | JX010007 | JX009870 | JX009489 | JX010407 |
|             | <i>C. viniferum</i>      | GZAAS5.08601  | China, Yunnan Province                   | <i>Vitis vinifera</i>        | JN412804 | JN412798 | -        | JN412795 | JN412813 |
|             | <i>C. wuxiense</i>       | CGMCC 3.17894 | China, Jiangsu Province                  | <i>Camellia sinensis</i>     | KU251591 | KU252045 | KU251939 | KU251672 | KU252200 |
|             | <i>C. xanthorrhoeae</i>  | ICMP 17903    | Australia                                | <i>Xanthorrhoea preissii</i> | JX010261 | JX009927 | JX009823 | JX009478 | JX010448 |
|             | <i>C. yulongense</i>     | CFCC 50818    | China, Yunnan Province                   | <i>Vaccinium dunalianum</i>  | MH751507 | MK108986 | MH793605 | MH777394 | MK108987 |
|             | <i>C. yunajiangensis</i> | YMF1.04996    | China, Yunnan province, yuanjiang county | <i>Ageratina adenophora</i>  | OK030885 | OK513686 | OK513583 | OK513620 | OK513649 |
|             | <i>C. yunajiangensis</i> | YMF1.04997    | China, Yunnan province                   | <i>Ageratina adenophora</i>  | OK030886 | OK513687 | OK513584 | OK513621 | OK513650 |
|             | <i>C. alcornii</i>       | IMI176619     | Australia                                | <i>Bothriochloa bladhii</i>  | JX076858 | -        | -        | -        | -        |
|             | <i>C. axonopodi</i>      | IMI 279189    | Australia                                | <i>Axonopus</i> spp.         | MN521699 | -        | -        | -        | -        |

| Complex                  | Species                 | Strain             | Locality             | Substrate                      | ITS      | gapdh    | chs-1    | act      | tub2     |
|--------------------------|-------------------------|--------------------|----------------------|--------------------------------|----------|----------|----------|----------|----------|
| graminicola-<br>caudatum | <i>C. baltimoreense</i> | BPI892771          | USA                  | <i>Sorghastrum nutans</i>      | JX076866 | -        | -        | -        | -        |
|                          | <i>C. caudatum</i>      | CBS 131602         | USA                  | <i>Sorghastrum nutans</i>      | JX076860 | -        | -        | -        | -        |
|                          | <i>C. caudasporum</i>   | CGMCC 3.15106      | China                | <i>Bletilla ochracea</i>       | JX625162 | KC843512 | -        | KC843526 | JX625190 |
|                          | <i>C. duyunensis</i>    | CGMCC 3.15105      | China                | <i>Bletilla ochracea</i>       | JX625160 | KC843515 | -        | KC843530 | JX625187 |
|                          | <i>C. echinochloae</i>  | MAFF 511473        | Japan                | <i>Echinochloa</i> sp.         | AB439811 | -        | -        | -        | -        |
|                          | <i>C. eleusines</i>     | MAFF 511155        | Japan, USA           | <i>Elusines</i> sp.            | JX519218 | -        | JX519226 | JX519234 | JX519243 |
|                          | <i>C. endophytum</i>    | CGMCC 3.15108      | China                | <i>Bletilla ochracea</i>       | JX625177 | KC843521 | -        | KC843533 | JX625206 |
|                          | <i>C. eremochloae</i>   | CBS 129661         | China, USA           | <i>Eremochloae ophiuroides</i> | JX519220 | -        | JX519228 | JX519236 | JX519245 |
|                          | <i>C. falcatum</i>      | CBS 147945         | Australia, Indonesia | <i>Saccharum officinarum</i>   | JQ005772 | -        | JQ005793 | JQ005835 | JQ005856 |
|                          | <i>C. graminicola</i>   | M 1.001/CBS 130836 | Worldwide            | <i>Zea mays</i>                | JQ005767 | -        | JQ005788 | JQ005830 | JQ005851 |
|                          | <i>C. hanaui</i>        | MAFF 305404        | China, Japan, USA    | <i>Digitaria ciliaris</i>      | JX519217 | -        | JX519225 | -        | JX519242 |
|                          | <i>C. jacksonii</i>     | MAFF 305460        | Japan                | <i>Echinochloa esculenta</i>   | JX519216 | -        | JX519224 | JX519233 | JX519241 |
|                          | <i>C. miscanthi</i>     | MAFF 510857        | Japan                | <i>Miscanthus sinensis</i>     | JX519221 | -        | JX519229 | JX519237 | JX519246 |
|                          | <i>C. navitas</i>       | CBS 125086         | USA                  | <i>Panicum</i> sp.             | JQ005769 | -        | JQ005790 | JQ005832 | JQ005853 |
|                          | <i>C. nicholsonii</i>   | MAFF 511115        | Japan, New Zealand   | <i>Paspalum dilatatum</i>      | JQ005770 | -        | JQ005791 | JQ005833 | JQ005854 |

| Complex    | Species                | Strain             | Locality                               | Substrate                     | ITS      | gapdh    | chs-1    | act      | tub2     |
|------------|------------------------|--------------------|----------------------------------------|-------------------------------|----------|----------|----------|----------|----------|
|            | <i>C. ochracea</i>     | CGMCC 3.15104      | China,Guizhou Province                 | <i>Bletilla ochracea</i>      | JX625168 | KC843513 | -        | KC843527 | JX625183 |
|            | <i>C. paspali</i>      | MAFF 305403        | Japan                                  | <i>Paspalum notatum</i>       | JX519219 | -        | JX519227 | JX519235 | JX519244 |
|            | <i>C. somersetense</i> | CBS 131599         | USA                                    | <i>Sorghastrum nutans</i>     | JX076862 | -        | -        | -        | -        |
|            | <i>C. sublineola</i>   | CBS 131301, S3.001 | Togo, USA                              | <i>Sorghum</i> sp.            | JQ005771 | -        | JQ005792 | JQ005834 | JQ005855 |
|            | <i>C. sp.</i>          | YMF1.06940         | China, GuiZhou province, Nayong county | <i>Ageratina adenophora</i>   | OK030882 | OK513683 | OK513580 | -        | -        |
|            | <i>C. zoysiae</i>      | MAFF238573         | Japan                                  | <i>Zoysia tenuifolia</i>      | JX076871 | -        | -        | -        | -        |
| magnum     | <i>C. liaoningense</i> | CGMCC 3.17616      | China,Liaoning Province                | <i>Capsicum annuum</i>        | KP890104 | KP890135 | KP890127 | KP890097 | KP890111 |
|            | <i>C. magnum</i>       | CBS 519.97         | USA                                    | <i>Citrullus lanatus</i>      | MG600769 | MG600829 | MG600875 | MG600973 | MG601036 |
|            | <i>C. okinawense</i>   | MAFF 240517        | Japan<br>Brazil                        | <i>Carica papaya</i>          | MG600767 | MG600827 | -        | MG600971 | MG601034 |
| orbiculare | <i>C. orbiculare</i>   | CBS 570.97         | Worldwide                              | genera of <i>Cucubitaceae</i> | KF178466 | KF178490 | KF178515 | KF178563 | KF178587 |
|            | <i>C. sidae</i>        | CBS 504.97         | USA                                    | <i>Sida spinosa</i>           | KF178472 | KF178497 | KF178521 | KF178569 | KF178593 |





| Complex     | Species                | Strain        | Locality                      | Substrate                         | ITS      | gapdh    | chs-1    | act      | tub2     |
|-------------|------------------------|---------------|-------------------------------|-----------------------------------|----------|----------|----------|----------|----------|
|             | <i>C. spinosum</i>     | CBS 515.97    | Argentina,<br>Australia       | <i>Xanthium<br/>spinosum</i>      | KF178474 | KF178498 | KF178523 | KF178571 | KF178595 |
|             | <i>C. tebeesti</i>     | CBS 522.97    | Canada                        | <i>Malva pusilla</i>              | KF178473 | KF178505 | KF178522 | KF178570 | KF178594 |
| orchidearum | <i>C. cattleyicola</i> | CBS 170.49    | Belgium,<br>Japan             | <i>Cattleya</i> sp.               | MG600758 | MG600819 | MG600866 | MG600963 | MG601025 |
|             | <i>C. cliviicola</i>   | CBS 125375    | China,Yunnan<br>Province      | <i>Clivia</i> sp.                 | MG600733 | MG600795 | MG600850 | MG600939 | MG601000 |
|             | <i>C. musicola</i>     | CBS 132885    | Mexico                        | <i>Musa</i> sp.                   | MG600736 | MG600798 | MG600853 | MG600942 | MG601003 |
|             | <i>C. orchidearum</i>  | CBS 135131    | China, Iran                   | <i>Cordyline</i>                  | MG600738 | MG600800 | MG600855 | MG600944 | MG601005 |
|             | <i>C. piperis</i>      | IMI 71397     | Malaysia                      | <i>Piper nigrum</i>               | MG600760 | MG600820 | MG600867 | MG600964 | MG601027 |
|             | <i>C. plurivorum</i>   | CBS 125474    | Benin, Brazil,<br>China, Iran | <i>Abelmoschus<br/>esculentus</i> | MG600718 | MG600781 | MG600841 | MG600925 | MG600985 |
|             | <i>C. plurivorum</i>   | YMF1.07332    | China,Yunnan<br>province      | <i>Ageratina<br/>adenophora</i>   | OK030900 | OK513701 | OK513596 | -        | OK513660 |
|             | <i>C. plurivorum</i>   | YMF1.07333    | China,Yunnan<br>province      | <i>Ageratina<br/>adenophora</i>   | OK030901 | OK513702 | OK513597 | -        | OK513661 |
|             | <i>C. sojiae</i>       | ATCC 62257    | Brazil, China,<br>Iran, Italy | <i>Arctium lappa</i>              | MG600749 | MG600810 | MG600860 | MG600954 | MG601016 |
|             | <i>C. vittalense</i>   | CBS 181.82    | India                         | <i>Calamus<br/>thwaitesii</i>     | MG600734 | MG600796 | MG600851 | MG600940 | MG601001 |
|             | <i>C. guizhouensis</i> | CGMCC 3.15112 | China,Guizho<br>u Province    | <i>Bletilla ochracea</i>          | JX625158 | KC843536 | -        | KC843536 | JX625185 |
| spaethianum | <i>C. lilii</i>        | CBS 109214    | Japan                         | <i>Lillium</i> sp.                | GU227810 | GU228202 | GU228300 | GU227908 | GU228104 |

| Complex   | Species                  | Strain         | Locality                               | Substrate                   | ITS      | gapdh    | chs-1    | act      | tub2     |
|-----------|--------------------------|----------------|----------------------------------------|-----------------------------|----------|----------|----------|----------|----------|
| truncatum | <i>C. spaethianum</i>    | CBS 167.49     | Germany                                | <i>Hosta sieboldiana</i>    | GU227807 | GU228199 | GU228297 | GU227905 | GU228101 |
|           | <i>C. curcumae</i>       | IMI 288937     | India                                  | <i>Curcuma longa</i>        | GU227893 | GU228285 | GU228383 | GU227991 | GU228187 |
|           | <i>C. jasminigenum</i>   | MFLUCC 10-0273 | Vietnam                                | <i>Jasminum sambac</i>      | HM131513 | -        | -        | -        | HM153770 |
|           | <i>C. truncatum</i>      | CBS 151.35     | Australia, Bangladesh                  | <i>Arachis hypogaea</i>     | GU227862 | GU228254 | GU228352 | GU227960 | GU228156 |
| singleton | <i>C. adenophorae</i>    | YMF1.04952     | China, Yunnan province, Lancang county | <i>Ageratina adenophora</i> | OK030859 | OK513662 | OK513558 | -        | -        |
|           | <i>C. citrus-medicae</i> | GUCC 1554      | China, Kunming                         | <i>Citrus medica</i>        | MN959910 | MT006331 | MT006328 | MT006325 | -        |
|           | <i>C. chlorophyti</i>    | IMI 103806     | Australia, India                       | <i>Chlorophytum</i> sp.     | GU227894 | GU228286 | GU228384 | GU227992 | GU228188 |
|           | <i>C. coccodes</i>       | CBS 369.75     | The Netherlands                        | <i>Rubus coreanus</i>       | HM171679 | HM171673 | JQ005796 | HM171667 | JQ005859 |
|           | <i>C. hsienjenchang</i>  | MAFF 243051    | Japan                                  | <i>Phyllostachys</i> sp.    | AB738855 | -        | AB738846 | AB738845 | -        |
|           | <i>C. metake</i>         | MAFF 244029    | Japan                                  | <i>Pleioblastus simoni</i>  | AB738859 | -        | -        | -        | -        |
|           | <i>C. nigrum</i>         | CBS 169.49     | Argentina                              | <i>Capsicum</i> sp.         | JX546838 | JX546742 | JX546693 | JX546646 | JX546885 |
|           | <i>C. orchidophilum</i>  | CBS 632.80     | Panama, UK, USA, France                | <i>Ascocenda</i> sp.        | JQ948151 | JQ948481 | JQ948812 | JQ949472 | JQ949802 |

| Complex  | Species                        | Strain        | Locality              | Substrate              | ITS      | gapdh    | chs-1    | act      | tub2     |
|----------|--------------------------------|---------------|-----------------------|------------------------|----------|----------|----------|----------|----------|
|          | <i>C. phaseolorum</i>          | CBS 158.36    | Japan                 | <i>Phaseolus</i> sp.   | GU227897 | GU228289 | GU228387 | GU227995 | GU228191 |
|          | <i>C. pseudoacutatum</i>       | CBS 436.77    | Chile                 | <i>Pinus radiata</i>   | JQ948480 | JQ948811 | JQ949141 | JQ949801 | JQ950131 |
|          | <i>C. pyrifolia</i>            | CGMCC 3.18902 | China, Hubei Province | <i>Pyrus pyrifolia</i> | MG748078 | MG747996 | MG747914 | MG747768 | MG748158 |
|          | <i>C. rusci</i>                | CBS 119206    | Italy                 | <i>Ruscus</i> sp.      | GU227818 | GU228210 | GU228308 | GU227916 | GU228112 |
|          | <i>C. sydowii</i>              | CBS135819     | Taiwan (China)        | <i>Sambucus</i> sp.    | KY263783 | KY263785 | KY263787 | KY263791 | KY263793 |
|          | <i>C. trichellum</i>           | CBS 217.64    | Canada, Germany       | <i>Hedera</i> sp.      | GU227812 | GU228204 | GU228302 | GU227910 | GU228106 |
| outgroup | <i>Monilochaetes infuscans</i> | CBS 869.96    | District of Columbia  | <i>Ipomoea batata</i>  | JQ005780 | JX546612 | JQ005801 | -        | JQ005864 |
