# Supplementary figures and images for: Fourteen New Species of Foliar Colletotrichum Associated with the Invasive Plant Ageratina adenophora and Surrounding Crops
Source: MDPI journal article supplement (doi:10.3390/jof8020185), 2022-02-13

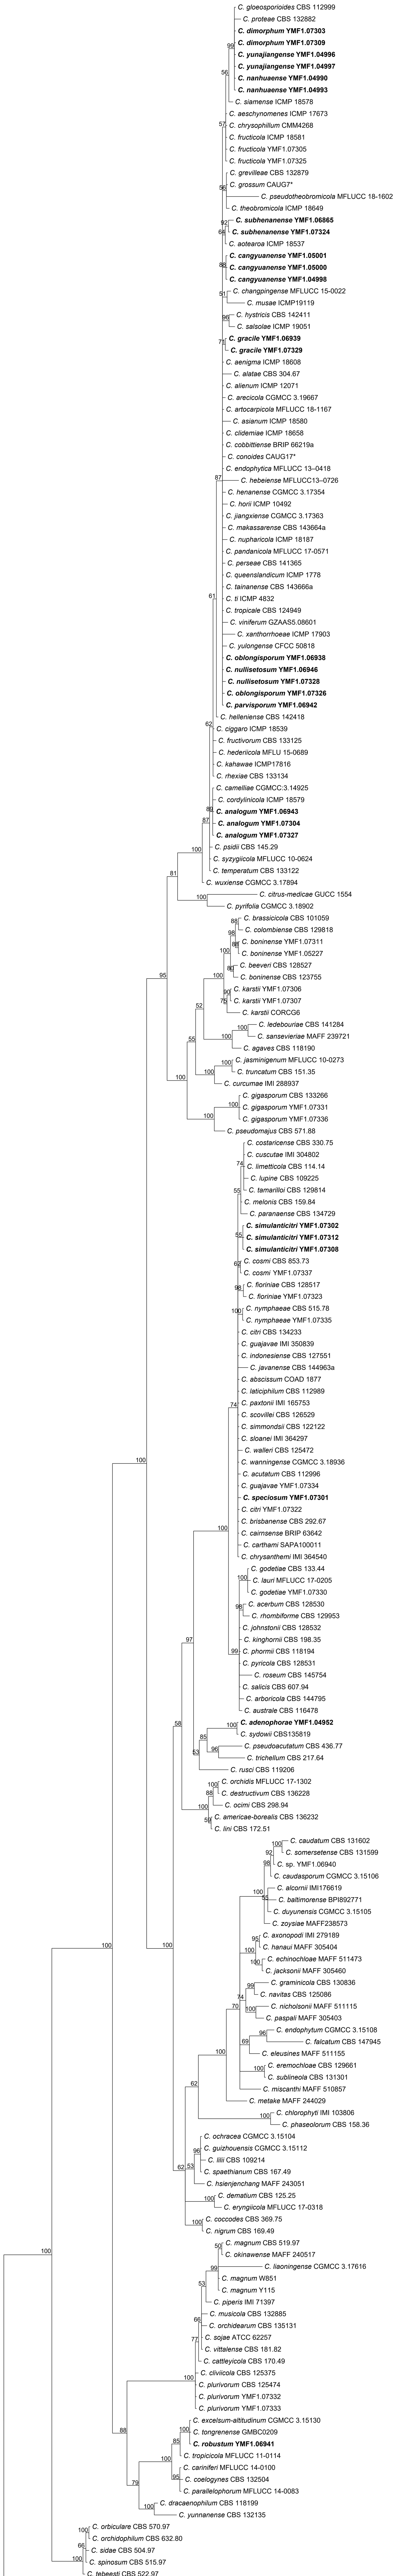

Supplement: s1 [file s1]

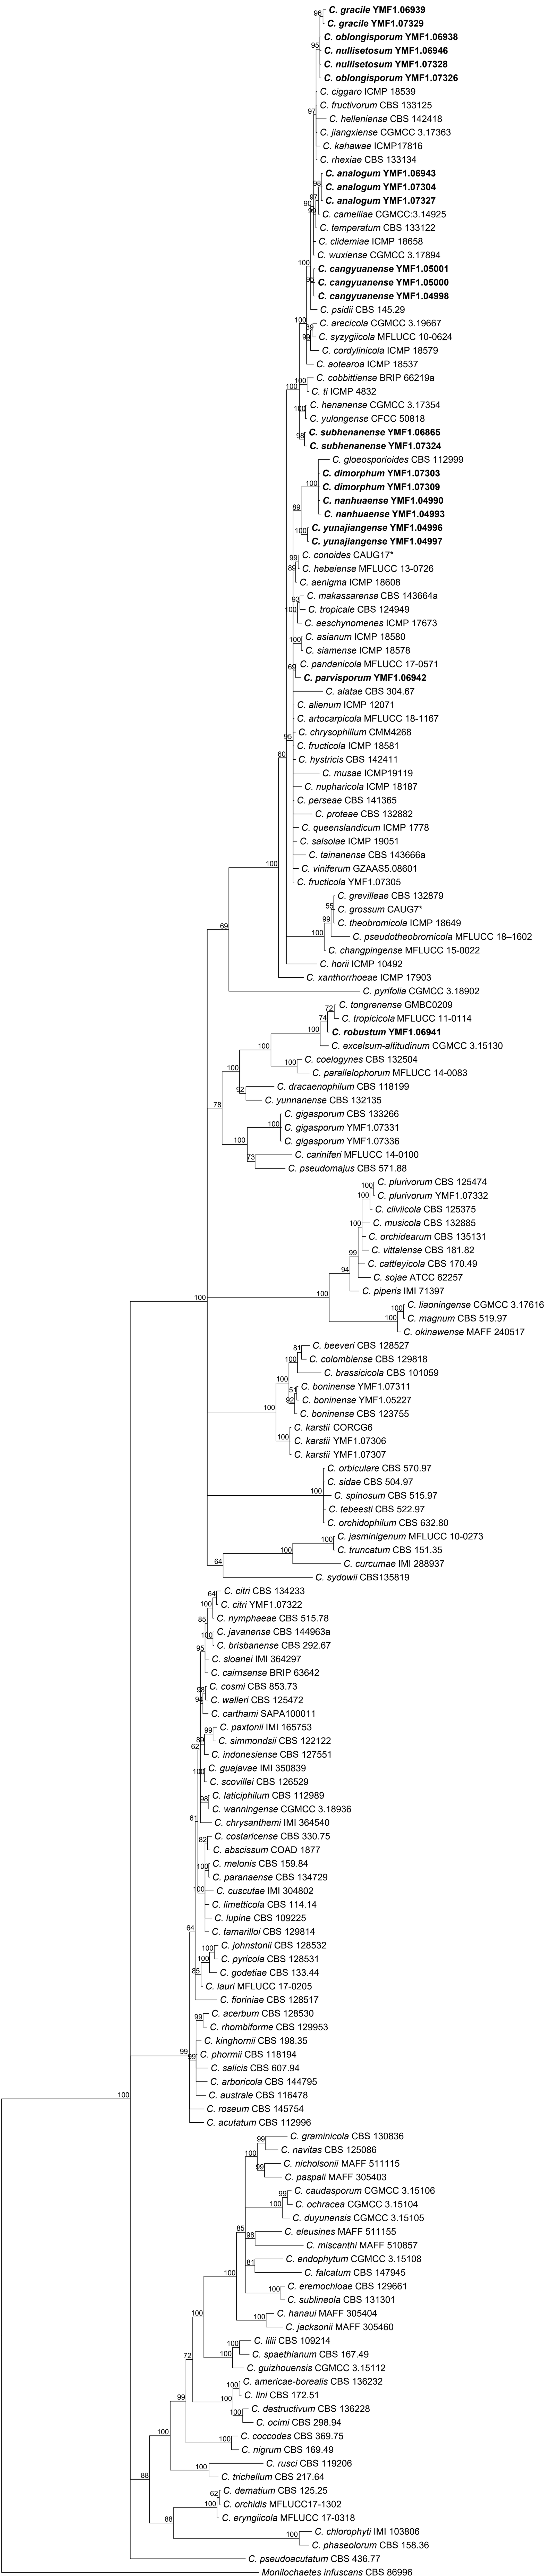

Supplement: s1 [file s1]

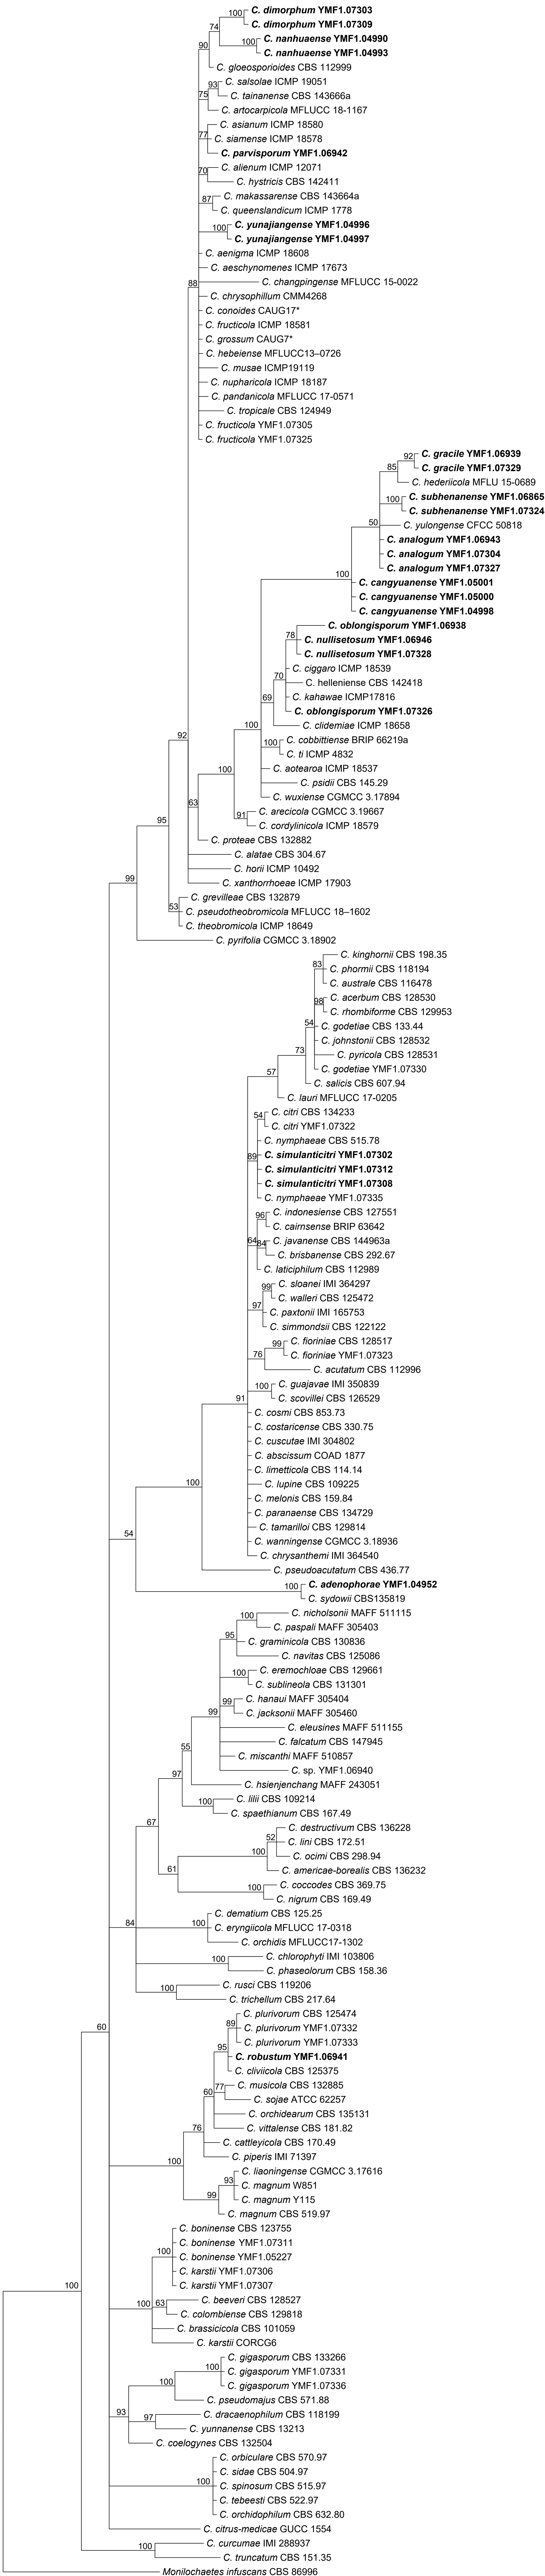

Supplement: s1 [file s1]

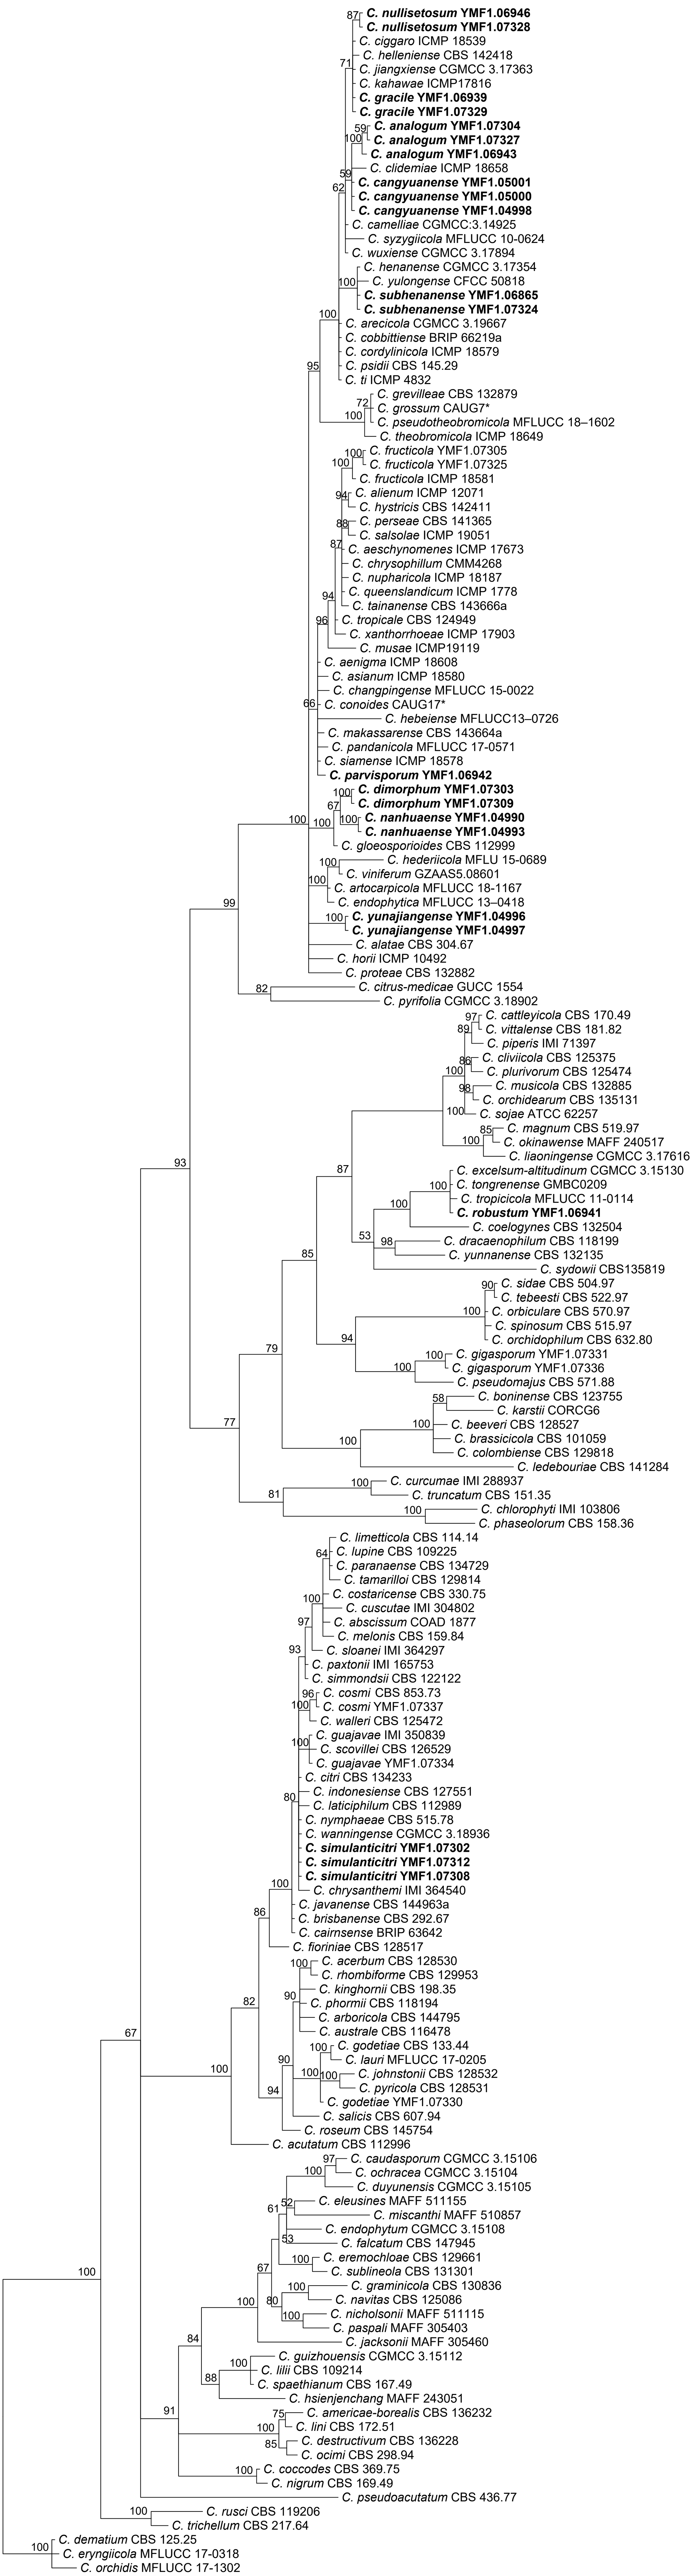

Supplement: s1 [file s1]

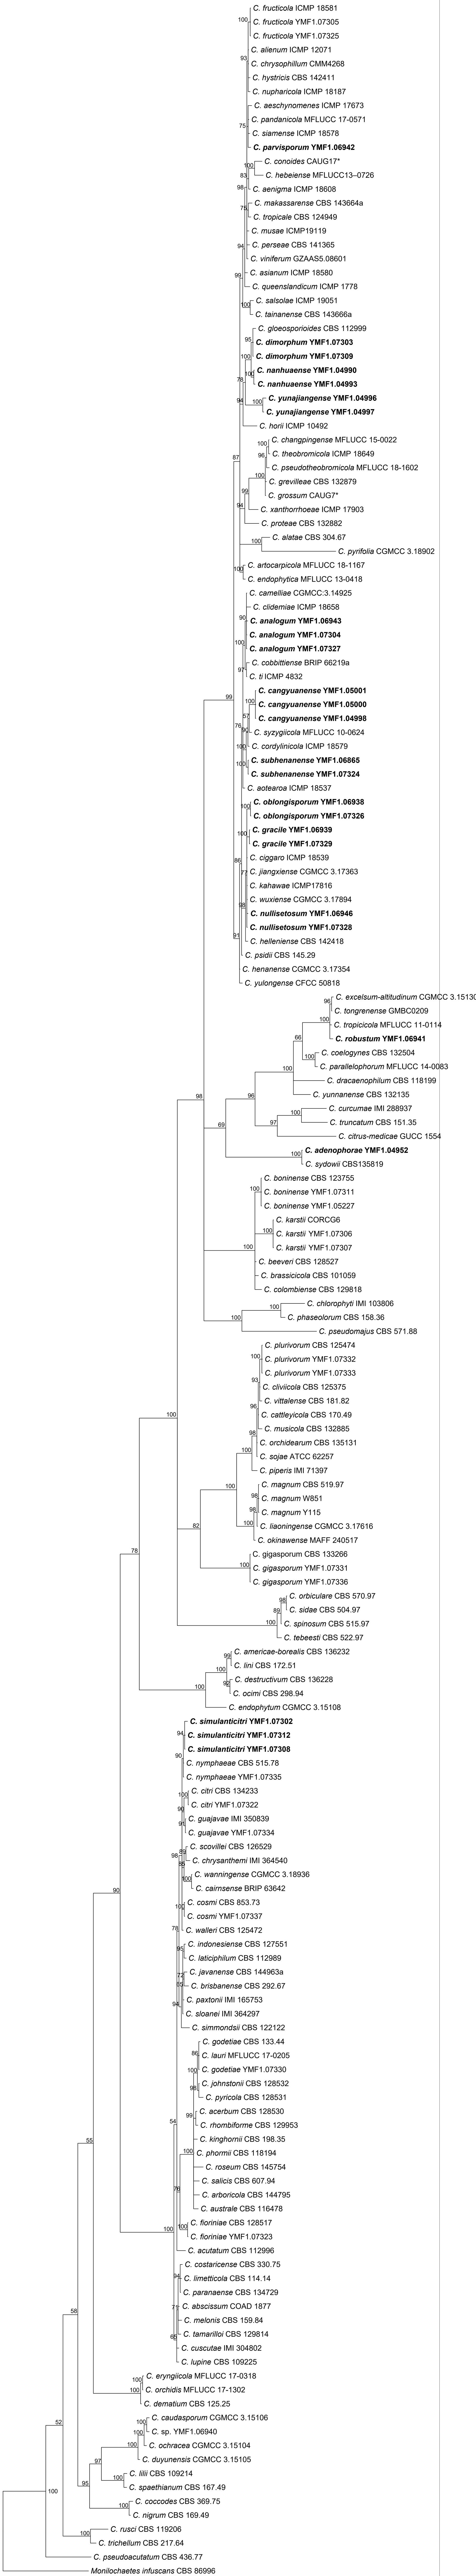

Supplement: s1 [file s1]
